# Supplementary material
Source: PubMed Central journal article supplement (PMC2740424)
Supplement: supp_M109.009928_supplement.pdf [file supp_M109.009928_supplement.pdf]

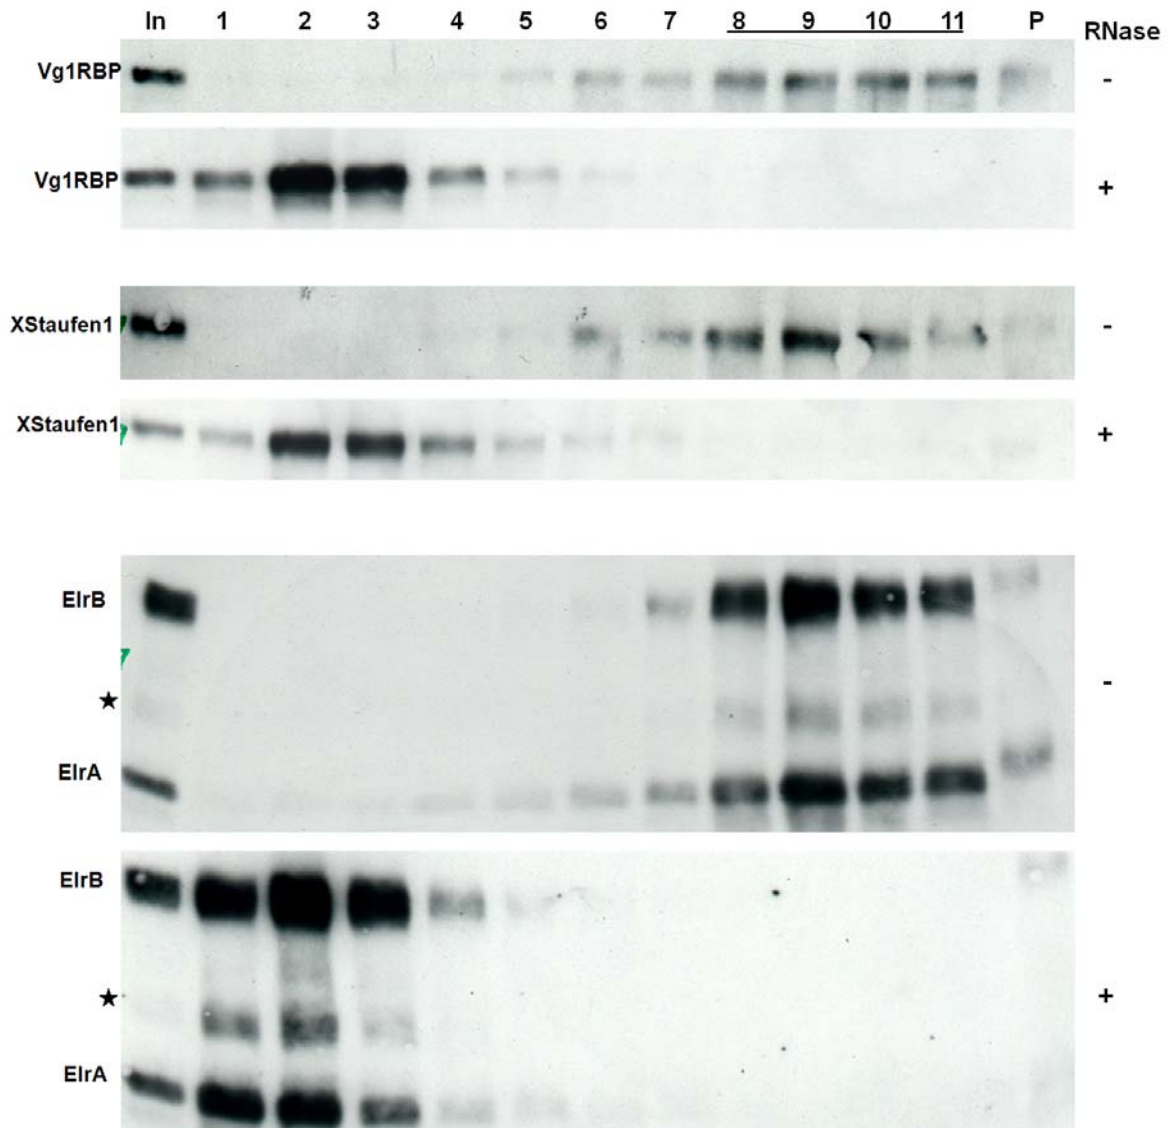

**Supplementary Figure 1.** Vegetal localization proteins and Elr-type proteins are part of large RNPs. Glycerol gradient fractionation of stage III-IV oocyte extracts plus/minus RNase A. In, input; lane 1-11, gradient fractions from top to bottom; P, pellet. Western blot analysis was performed using antibodies directed against XStaufen1, Vg1RBP and ElrA/B. Underlined fractions represent the peak localization RNP fractions (RNP S16 fraction, see also Fig 1A). A signal corresponding to a putative ElrB-isoform is marked by an asterisk.

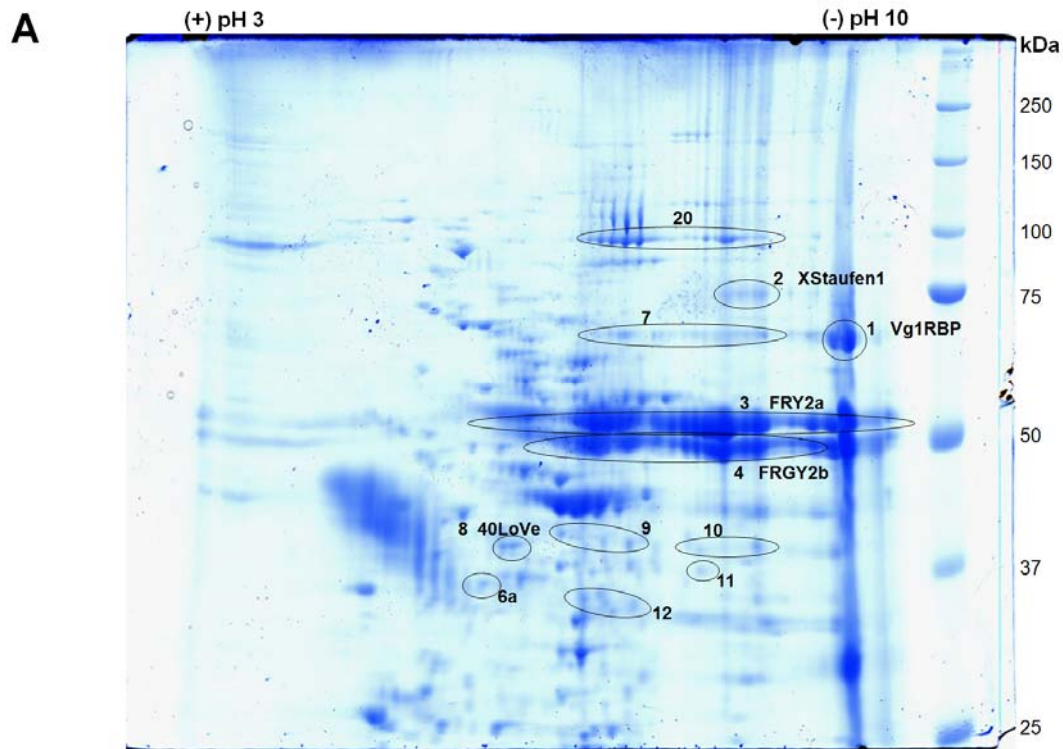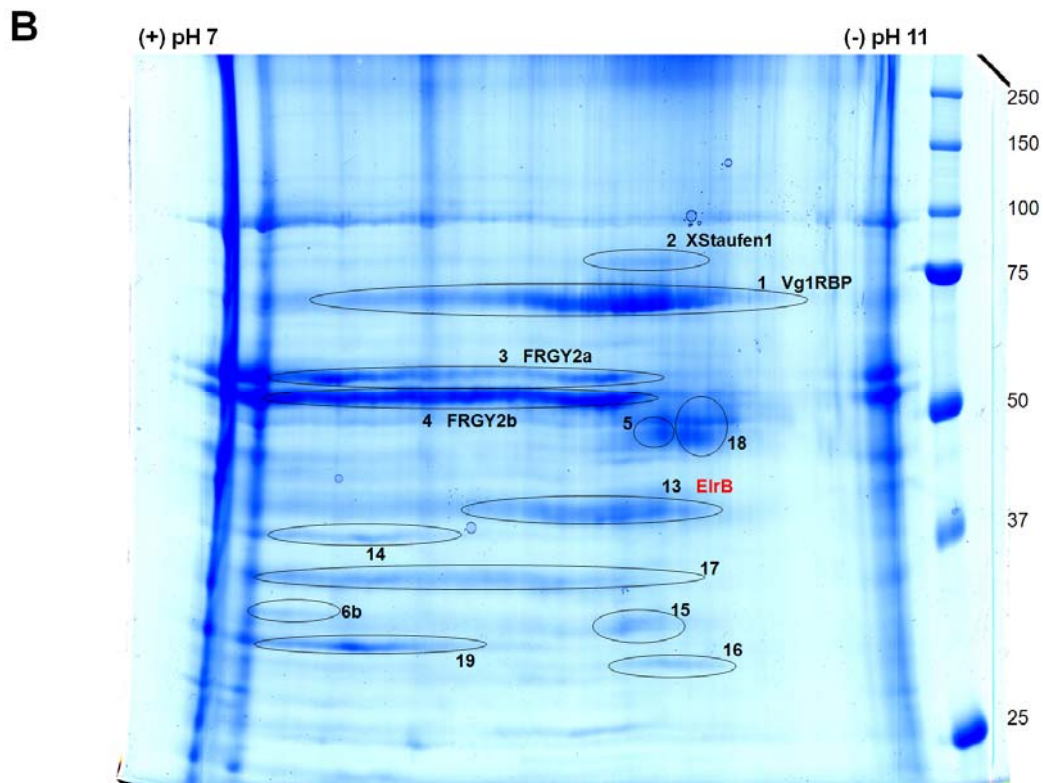

**Supplementary Figure 2.** 2D gel electrophoretic separation of RNP S200 proteins. Proteins of the RNP S200 preparation were resolved by 2D gel electrophoresis using either pH 3-10 (Bio-Rad) (**A**) or pH 7-10 (GE healthcare) (**B**) immobilised pH gradient (IPG) strips for the isoelectric focussing. Protein spots were analyzed by mass spectrometry. Proteins with a functional link to RNA metabolism are indicated by circles (for protein identities see Table S1).

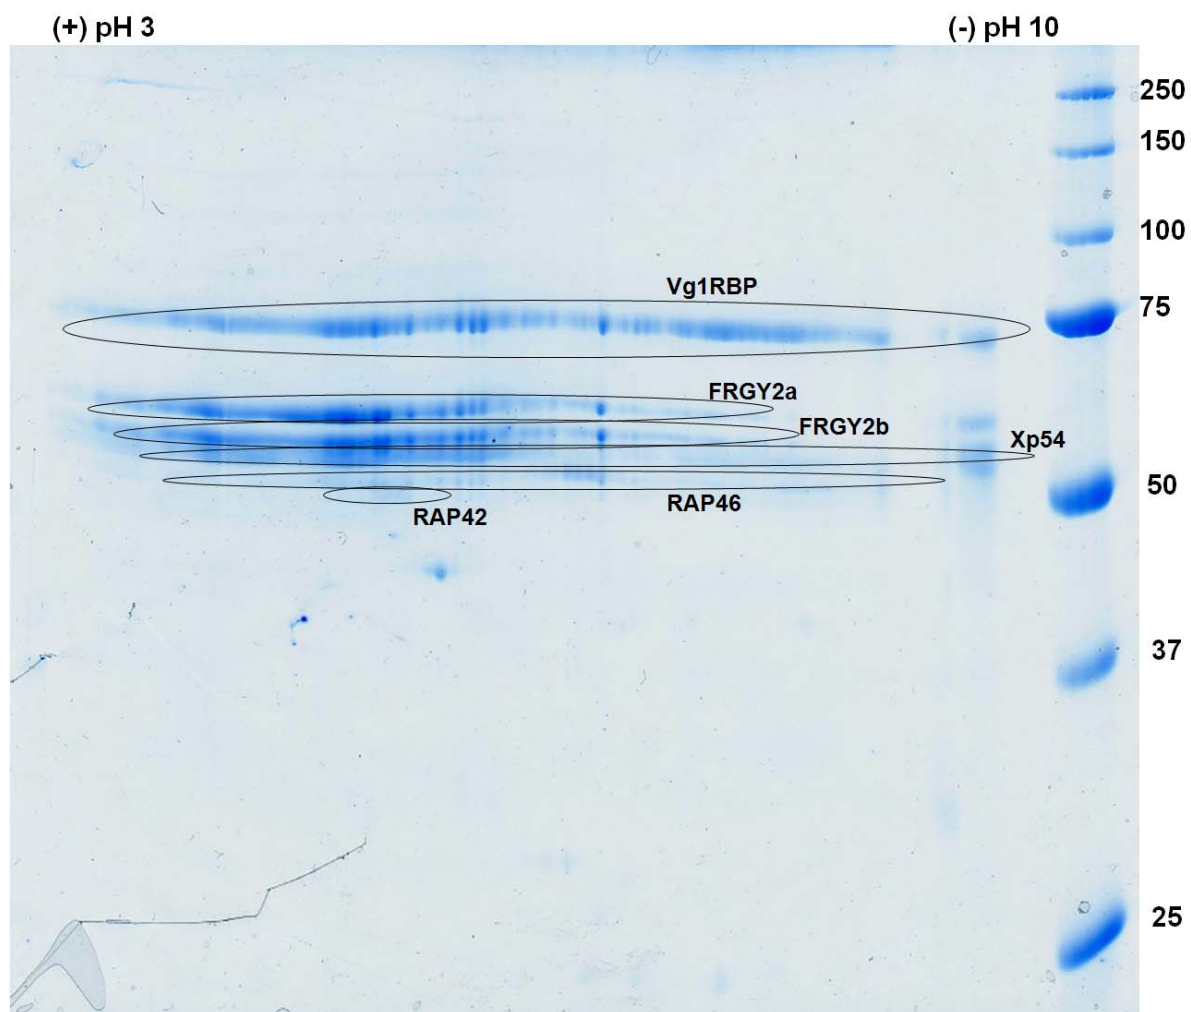

**Supplementary Figure 3.** 2D gel electrophoretic separation of ElrA/B interacting proteins. Proteins co-immunoprecipitating with ElrA/B in an RNA-dependent manner (fraction “d” depicted in figure 2) were separated by 2D gelelectrophoresis and analyzed by mass spectrometry. Spots picked from the circled protein bands were identified as indicated (for protein identities see also Table S2).



### Lsm domain

|        |     |                                                      |
|--------|-----|------------------------------------------------------|
| xRAP55 | 1   | MSGGTPYIGSKISLISKAEIRYEGILYITIDTENSTVALAKVRSFGTEDRP  |
| xRAP46 | 1   | ..S.....Q.....                                       |
| xRAP42 | 1   | ..S.....Q.....                                       |
| xRAP55 | 51  | TDRPIPPRDEIFEYIIFRGSDIKDLTVCEPPKQCQLPQDPAIVQSSLGS    |
| xRAP46 | 51  | ....A...E.VY.....I.....ASHA.....                     |
| xRAP42 | 51  | ....A...E.VY.....I.....ASHA.S.....-                  |
| xRAP55 | 101 | SSASSFQSVSSYGPFGRMPAYSQFNTGPLVGPQFGA-VGV---GSSLTSF   |
| xRAP46 | 101 | AP.A.Y.PSVP.S.RG..T...LAATS.LSQ.YA.SL.LEKL..PTA.A    |
| xRAP42 | 100 | -.A.Y.PSVP.S.RG..T...LAATS.LSQ.YA.-----              |
| xRAP55 | 147 | GAETTSSTSLPPSSAVGTSFTQEARLKTQSSQGQSSSPLDSLKSPNIE     |
| xRAP46 | 151 | ..--S..C.S.SPQP.APEPDVP.EPPQLSQNA.YP.I.---V....MV.   |
| xRAP42 | 135 | -----L.LAGF.SIPV....MV.                              |
| xRAP55 | 197 | QAVQTAAAPH-APSTATVGRRRSPVLSRPVPSIIQKTAESPEQRKGLHKM   |
| xRAP46 | 196 | ....GPLENQ.QKKVQQAQGA..GQ.G.RQ.-----G.QSQPAP.---     |
| xRAP42 | 154 | ....GPLENQ.QKKVQQAQGA..GL.G.RQ.-----G.QSQPAP.N--     |
| xRAP55 | 246 | QRPDIDQLKNDKNDPSKROPVLSAL-----QPRRGRGGNRGGRRGRF-GVR  |
| xRAP46 | 237 | -----V.PPAA...GTINDENRR.P.R.S...RT.N.SR.QN           |
| xRAP42 | 196 | VP.PAAPVLGTV..ENR.P.-----R.S...RT.N.SR.QN            |
| xRAP55 | 290 | R-----DGPMPKFEKDFDFESANAQFNKEEIDREFHNKLIKIKDDKPEKPVN |
| xRAP46 | 275 | .PTTVKEN.I...G.....T.....R..L.K..KD..NF.EE....--E    |
| xRAP42 | 233 | .PTTVKENAI...G.....R..L.K..KD..NF.....A--            |
| xRAP55 | 335 | GEDKTDSVVDTONSEGNAEEEEVLGGVCYYDKTKSFFDNISCDDNRRR     |
| xRAP46 | 323 | ..E....G.E...D..P..DPL--.PNT...RS.....-SEMKS..       |
| xRAP42 | 281 | ..E....G.E...D..P..DPL--.PNT...RS.....-SEMKS..       |
| xRAP55 | 385 | QTWAEERRINVEITGLPLRSNRGRGGFRGRGGMGFRGGRGRGGERRGAP    |
| xRAP46 | 370 | T.....KL.T...VSG.FL...S-.....-.....SAAP..N--         |
| xRAP42 | 328 | T.....KL.T...VSG.FL...S-.....-.....SAAP..N--         |
| xRAP55 | 435 | GGGGFGPARGFRGGFRGGRGGREFADYEYRKDNKVAA                |
| xRAP46 | 412 | -----QTTQ.A.T.-----R.--                              |
| xRAP42 | 370 | -----QTTQ.A.T.-----R.--                              |

**Supplementary Figure 4.** Protein alignment of ElrA/B interacting Rap55 homologs. Amino acid sequence comparison between *Xenopus* RAP55 (accession number BAF36055) and the two Rap55-related proteins RAP46 (accession number BC079811) and RAP42 (accession number BC100174) was performed using the Clone Manager software (Sci-Ed software). The following protein sequence identities in comparison to XRap55 were observed: xRAP46 (48%), xRAP42 (47%). The conserved N-terminal Lsm-domain is marked by a box.

```

XDE LE          1 CUGCCCUUGCAUCCUACAUUUUAAAAGGGAGAUUUUUUUUUUUUGCAUUGGU
XDE LE mut1    1 .....A..A..A.....
XDE LE mut2    1 .....G.....GA..A.GA.....

XDE LE          51 GUAAAAGCUAAAUUUUUGUUUCACUUUAUUUAUUUUUUUCACUUGUUAUUGC
XDE LE mut1    51 .....A..A..A.....A...A..A.....
XDE LE mut2    51 .....GA..AG..A....G...A...GA.GA.....G.....

XDE LE          101 ACUUUUUUUGUAUGUGUGUAUCUUGCACUUAAGAUCGGAAAAUAAGUGUUG
XDE LE mut1    101 ...A..A.....
XDE LE mut2    101 ...GA.GA.....

XDE LE          151 CCACCUGUCUUGAUUUUCACCUGGAAAGGCAGUUUUUCAUAAAAGGGCUUU
XDE LE mut1    151 .....A.....A..A.....
XDE LE mut2    151 .....A.....A..A.....

XDE LE          201 CCUGGUGAAAACUGUCUGUCCAGAACUUUGAAGUGAGGCGAUGAGCUGAA
XDE LE mut1    201 .....
XDE LE mut2    201 .....

XDE LE          251 ACGUCAUCUGCCUGCUCUCCUGC
XDE LE mut1    251 .....
XDE LE mut2    251 .....

```

**Supplementary Figure 5.** Mutagenesis of putative ElrA/B binding sites in the XDE-LE. Sequence comparison of XDE-LE wt and XDE-LE point mutants 1 and 2. Single U residues of the A/U-rich putative Elr-binding sites were replaced by A or G residues by site-directed mutagenesis.

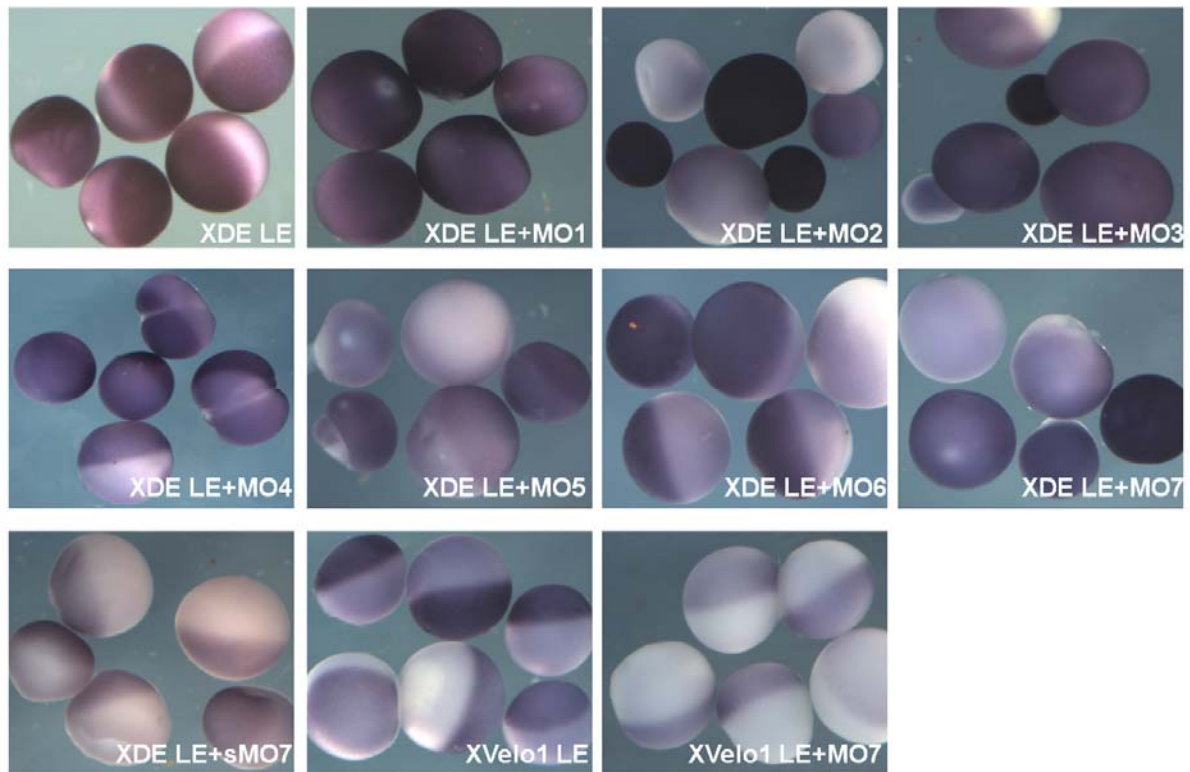

**Supplementary Figure 6.** Co-injection of MOs blocking ElrB binding interferes with localization of XDE-LE RNA. 0.3 fmol lacZ tagged XDE-LE and 50 fmol morpholino oligonucleotide were co-injected into stage III-IV oocytes. Co-injection with lacZ-tagged Xvelo1-LE lacking binding sites for MO7 served as a control. The distribution of the XDE-LE RNA was visualised by whole mount *in situ* hybridization using an antisense lacZ probe.

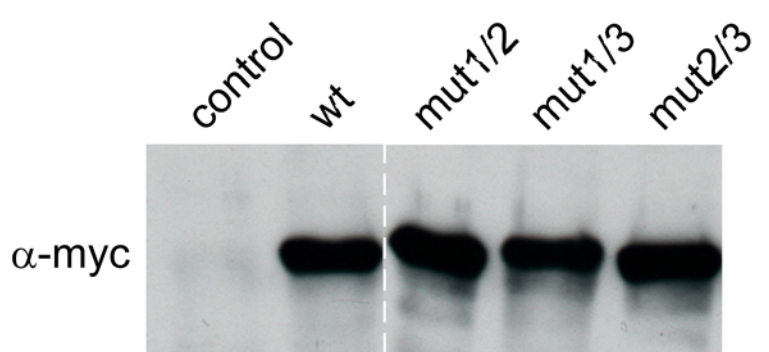

**Supplementary Figure 7.** Overexpression of wt and mutant ElrB proteins. Overexpression of myc-tagged wt and mutant versions of ElrB in stage III/IV oocytes prior to injection of XDE-LE and Velo1-LE RNAs (see also figure 3G). Proteins from one oocyte equivalent were detected by western blotting using a  $\alpha$ -myc antibody.

| Spot # | Protein Name                                          | Accession #  | kDa   | pI   |
|--------|-------------------------------------------------------|--------------|-------|------|
| 1      | KH domain-containing transcription factor B3 (Vg1RBP) | gi 148229563 | 65.6  | 9.08 |
| 2      | XStaufen1                                             | gi 49256219  | 78.1  | 9.6  |
| 3      | FRGY2a                                                | gi 1175535   | 37.2  | 10.0 |
| 4      | FRGY2b                                                | gi 1175534   | 35.9  | 9.4  |
| 5      | Hypothetical protein (RAP42)                          | gi 71679779  | 42.0  | 9.7  |
| 6a     | p37 AUF1/hnRNP D                                      | gi 52082714  | 33.1  | 5.7  |
| 6b     | hnRNP D-like                                          | gi 46249880  | 33.1  | 8.9  |
| 7      | Similar to G3BP 2                                     | gi 148236557 | 54.4  | 5.4  |
| 8      | hnRNP A/B (40LoVe)                                    | gi 49257602  | 35.9  | 5.7  |
| 9      | hnRNP A3b                                             | gi 147905111 | 39.4  | 6.8  |
| 10     | hnRNP A3a                                             | gi 148230657 | 38.6  | 6.8  |
| 11     | hnRNP A1                                              | gi 148237229 | 40.5  | 9.3  |
| 12     | hnRNP A1a                                             | gi 147900728 | 37.9  | 9.1  |
| 13     | <b>ElrB</b>                                           | gi 608539    | 42.7  | 9.7  |
| 14     | hnRNP E2                                              | gi 5459450   | 37.5  | 7.6  |
| 15     | dsRNA Binding Protein A - XIRBPA                      | gi 3334381   | 33.3  | 8.5  |
| 16     | ePABP2 (embryonic nuclear type)                       | gi 28273596  | 24.5  | 8.8  |
| 17     | GAPDH                                                 | gi 27882192  | 36.1  | 8.2  |
| 18     | EF1 $\alpha$                                          | gi 416929    | 50.9  | 9.7  |
| 19     | Guanine nucleotide BP $\beta$ 2-like 1                | gi 27371211  | 35.5  | 7.6  |
| 20     | Eukaryotic translation elongation factor 2,           | gi 27882475  | 95.42 | 6.45 |

**Supplementary Table 1.** Proteins identified from RNP S200 with a functional link to RNA metabolism. Partial list of proteins identified from the 2D gels in Fig. S2, selected on the basis of their functional link to RNA metabolism. The nominal molecular mass and the putative isoelectric point (pI) were estimated from the amino acid sequences using the Mascot Software 2.0 (Matrix Science). Spot numbers correspond to numbered circles indicated on the gels in figure S2.



| Protein Name                                          | Accession # | Size (kDa) | pI  | Remarks                                      |
|-------------------------------------------------------|-------------|------------|-----|----------------------------------------------|
| KH domain-containing transcription factor B3 (Vg1RBP) | gi 2801766  | 65.6       | 9.1 | Vg1RBP                                       |
| FRGY2a                                                | gi 1175535  | 37.2       | 9.6 |                                              |
| FRGY2b                                                | gi 1175534  | 36.0       | 7.9 |                                              |
| Xp54                                                  | gi 1709533  | 54.5       | 8.9 |                                              |
| RAP46                                                 | gi 51258579 | 46.2       | 9.4 | Unknown proteins which are related to RAP55, |
| RAP42                                                 | gi 71679779 | 42.0       | 9.7 |                                              |

**Supplementary Table 2.** ElrA/B associated proteins. List of proteins identified from the 2D gel shown in figure S3. The nominal molecular mass and the putative isoelectric point (pI) were estimated from the amino acid sequences using the Mascot Software 2.0 (Matrix Science).

## Supplementary materials

### XDE-LE site-directed mutagenesis primers

External primers:

T7 TAATACGACTCACTATAGGG

SP6 GATTACGCCAAGCTATTTAGGTGACACTATAGAATACTCA

XDE-LE mutagenesis primers:

XDE P1f ACATTTTAAAGGGAGATTATTATTATTGCATTGGTGTAAAGC

XDE P1r GCTTTACACCAATGCAATAATAATAATCTCCCTTTAAAATGT

XDE P2f GCATTGGTGTAAAGCTAATTATTATTACACTTTATTTATT

XDE P2r AATAAATAAAGTGTAAATAATAATTAGCTTTACACCAATGC

XDE P3a f TTTTGTTCACCTTTATATATTATTATCACTTGTTATTGCAC

XDE P3a r GTGCAATAACAAGTGATAATAATATATAAAGTGAAACAAAA

XDE P3b f TATTATTACACTTTATATATTATTATCACTTGTTATTGCAC

XDE P3b r GTGCAATAACAAGTGATAATAATATATAAAGTGTAAATAATA

XDE P4f CACTTGTTATTGCACCTTATTATGTATGTGTGTATCTTGCAC

XDE P4r GTGCAAGATACACACATACATAATAAGTGTGCAATAACAAGTG

XDE P5 f CTGTCTTGATTATCACCTGGAAAGGCAGTATATCATAAAGGGC

XDE P5 r GCCCTTTATGATATACTGCCTTTCCAGGTGATAATCAAGACAG

XDE m2a F ACATTGTAAAGGGAGATGATTATGATTGCATTGGTGTAAAGC

XDE m2a R GCTTTACACCAATGCAATCATAATCATCTCCCTTTACAATGT

XDE m2b F GCATTGGTGTAAAGCTAATGATTAGTACACTGTATATATT

XDE m2b R AATATATACAGTGTACTAATCATTAGCTTTACACCAATGC

XDE m2c F GATTAGTACACTGTATATATGATGATCACTTGCTATTGCAC

XDE m2c R GTGCAATAGCAAGTGATCATATATACAGTGTACTAATC

XDE m2d F CACTTGGTATTGCACCTGATGATGTATGTGTGTATCTTGCAC

XDE m2d R GTGCAAGATACACACATACATCATCAGTGTGCAATAACAAGTG

### ElrB site-directed mutagenesis primers

B1 mut1 F GAAGGACAAAGCTTGGGCGCTGGCGATGTGAACTACATTGACC

B1 mut1 R AGGGTCAATGTAGTTTCACATCGCCAGCGCCCAAGCTTTGTCCCT

B1 mut2 F ACTGGTGTGTCAAGAGGGGCTGGCGATATACGCTTTGACAAGA

B1 mut2 R CCTCTTGTCAAAGCGTATATCGCCAGCCCCTCTTGACACACCA

B1 mut3 F ACCAACAAGTGCAAGGGCGCTGGTGTATGTGACTATGACAAACTA

B1 mut3 R ATAGTTTGTATAGTACATCACCAGCGCCCTTGCACTTGTGGT

### Morpholino oligonucleotides

Antisense and sense morpholino oligonucleotides were purchased from Gene Tools:

MO1 TAAATAAAGTGAAACAAAAATTAGC

MO2 AAAGTGCAATAACAAGTGAAAAAAA

MO3 AAGTGCAAGATACACACATACAAAA

MO4 GGTGGCAACACTATTTTCCGATCTT

MO5 ACTGCCTTTCCAGGTGAAAATCAAG

MO6 GTTTTCACCAGGAAAGCCCTTTATG

MO7 TACAAAAAAGTGCAATAACAAGTG

sMO7 CACTTGTTATTGCACCTTTTTTTGTAT

## Quantitative RT-PCR primers

GapDH-F CTCCGCCCCCTCAGCAGATG  
GapDH-R GCAGGCGGCAGGTCAGAT  
ODC-F GCCATTGTGAAGACTCTCTCCATTC  
ODC-R TTCGGGTGATTCCCTTGCCAC  
LaminB1-F CAACTAAAGGCAAAAGAAAGAGAA  
LaminB1-R ACGGTTGTGCGCTGTGCTACT  
Vg1-primers were as in (Kress et al., 2004)  
VegT-F CAAGTAAATGTGAGAAACCG  
VegT-R CAAATACACACACATTTCCC  
XDE-primers were as in (Horvay et al., 2006)  
XNIF-F CTGCTAGACCGGTGGGGAGTGT  
XNIF-R AGGGTGGAGAAGCGAAGAGTCAA

## Primers for the generation of T7 promoter containing templates for in vitro transcription

T7\_XDeadsouth2 LE F TAATACGACTCACTATAGGGCGGGATCCATTCTATTAATAA  
XDeadsouth2 LE\_R CCGCTCGAGTGGGCGATTCTACACAATTTG  
T7\_Vg1TE\_F TAATACGACTCACTATAGGGATGCCATTGACATACAAGTG  
Vg1TE\_R ATGCATTTTTAGGTATGTAAAAGCACGTTAA  
T7\_VegT-LE\_F TAATACGACTCACTATAGGGGTGGTGGTACAGCCATCTAA  
VegT-LE\_R CATTGCCAGAGTTATGCTAATGTGAAAATAT  
T7\_Xvelo\_3'UTR\_F TAATACGACTCACTATAGGGGTGTAAAGTGTATATATCTCTC  
Xvelo\_3'UTR\_R CCGCTCGAGTAAGTACATTATTTGCAG

Xvelo1 LE, XNIF and Vg1LE were transcribed from pBluescript constructs produced with BamHI/XhoI site containing primers as used previously (Claussen and Pieler, 2004; Claussen et al., 2004).
